# Supplementary material for: Inverted Soil Mounding as a Restoration Approach of Seismic Lines in Boreal Peatlands: Implications on Plant and Arthropod Abundance and Diversity
Source: MDPI journal article supplement (doi:10.3390/f14112123), 2023-10-25
Supplement: s1 [file s1]

### Supplementary data

**Table S1.** Results of the General Linear Mixed-Effects Models for understory percent cover and diversity, and ground-dwelling arthropod catches as affected by mounding treatment. Values in bold type indicate significance ( $\alpha = 0.05$ ).

| Response variable       | Variance structure | F      | num. df | den. df | P value | Contrasts             | P value |
|-------------------------|--------------------|--------|---------|---------|---------|-----------------------|---------|
| Bryophyte cover         | Treatment and Site | 1947.2 | 3       | 12      | <0.001  | Reference - Untreated | 0.400   |
|                         |                    |        |         |         |         | Reference - Top       | <0.001  |
|                         |                    |        |         |         |         | Reference - Ground    | <0.001  |
|                         |                    |        |         |         |         | Untreated - Top       | <0.001  |
|                         |                    |        |         |         |         | Untreated - Ground    | <0.001  |
|                         |                    |        |         |         |         | Top - Ground          | <0.001  |
| Forb cover              | Treatment and Site | 2.4    | 3       | 12      | 0.12    | -                     | -       |
| Graminoid cover         | Site               | 6.2    | 3       | 12      | 0.009   | Reference - Untreated | 0.402   |
|                         |                    |        |         |         |         | Reference - Top       | 0.999   |
|                         |                    |        |         |         |         | Reference - Ground    | 0.010   |
|                         |                    |        |         |         |         | Untreated - Top       | 0.675   |
|                         |                    |        |         |         |         | Untreated - Ground    | 0.268   |
|                         |                    |        |         |         |         | Top - Ground          | 0.024   |
| Shrub cover             | Treatment and Site | 5.8    | 3       | 12      | 0.011   | Reference - Untreated | 1.000   |
|                         |                    |        |         |         |         | Reference - Top       | 0.010   |
|                         |                    |        |         |         |         | Reference - Ground    | 0.386   |
|                         |                    |        |         |         |         | Untreated - Top       | 0.067   |
|                         |                    |        |         |         |         | Untreated - Ground    | 0.612   |
|                         |                    |        |         |         |         | Top - Ground          | 0.380   |
| Understory cover        | Treatment and Site | 118.6  | 3       | 12      | <0.001  | Reference - Untreated | 0.675   |
|                         |                    |        |         |         |         | Reference - Top       | <0.001  |
|                         |                    |        |         |         |         | Reference - Ground    | 0.991   |
|                         |                    |        |         |         |         | Untreated - Top       | <0.001  |
|                         |                    |        |         |         |         | Untreated - Ground    | 0.734   |
|                         |                    |        |         |         |         | Top - Ground          | <0.001  |
| Vascular plant richness | Site               | 25.3   | 3       | 12      | <0.001  | Reference - Untreated | <0.001  |
|                         |                    |        |         |         |         | Reference - Top       | 0.082   |
|                         |                    |        |         |         |         | Reference - Ground    | 0.066   |
|                         |                    |        |         |         |         | Untreated - Top       | <0.001  |
|                         |                    |        |         |         |         | Untreated - Ground    | 0.826   |
|                         |                    |        |         |         |         | Top - Ground          | 0.001   |
|                         | Site               | 4.3    | 3       | 12      | 0.027   | Reference - Untreated | 1.000   |

| Response variable                                      | Variance structure | <i>F</i> | num. df | den. df | <i>P</i> value | Contrasts             | <i>P</i> value |
|--------------------------------------------------------|--------------------|----------|---------|---------|----------------|-----------------------|----------------|
| Vascular plant diversity<br>(exponential of Shannon's) |                    |          |         |         |                | Reference - Top       | 0.130          |
|                                                        |                    |          |         |         |                | Reference - Ground    | 0.259          |
|                                                        |                    |          |         |         |                | Untreated - Top       | 0.172          |
|                                                        |                    |          |         |         |                | Untreated - Ground    | 0.310          |
|                                                        |                    |          |         |         |                | Top - Ground          | <b>0.017</b>   |
| Spider catch                                           | None               | 6.1      | 2       | 8       | <b>0.025</b>   |                       |                |
| Rove beetle catch                                      | Treatment          | 20.4     | 2       | 8       | < <b>0.001</b> | Untreated - Mounded   | 0.134          |
|                                                        |                    |          |         |         |                | Untreated - Reference | 0.720          |
|                                                        |                    |          |         |         |                | Mounded - Reference   | <b>0.020</b>   |
|                                                        |                    |          |         |         |                | Untreated - Mounded   | 0.198          |
|                                                        |                    |          |         |         |                | Untreated - Reference | 0.699          |
| Ant catch                                              | None               | 4.7      | 2       | 8       | <b>0.045</b>   | Mounded - Reference   | <b>0.001</b>   |
|                                                        |                    |          |         |         |                | Untreated - Mounded   | 0.052          |
|                                                        |                    |          |         |         |                | Untreated - Reference | 0.054          |
|                                                        |                    |          |         |         |                | Mounded - Reference   | 0.504          |
| Ground beetle catch                                    | None               | 1.8      | 2       | 8       | 0.222          | -                     | -              |
